# Supplementary material for: A Genomotaxonomy View of the Bradyrhizobium Genus
Source: PubMed Central journal article supplement (PMC6585233; doi:10.3389/fmicb.2019.01334), 2019-06-13

Supplementary Fig. 1

Phylogenomic tree of Bradyrhizobiaceae rooted with genomes of Xanthobacter. The tree was constructed with maximum likelihood using a concatenated alignment of 31 conserved proteins identified with AMPHORA2. Bootstrap node support values lower than 70% are not shown.

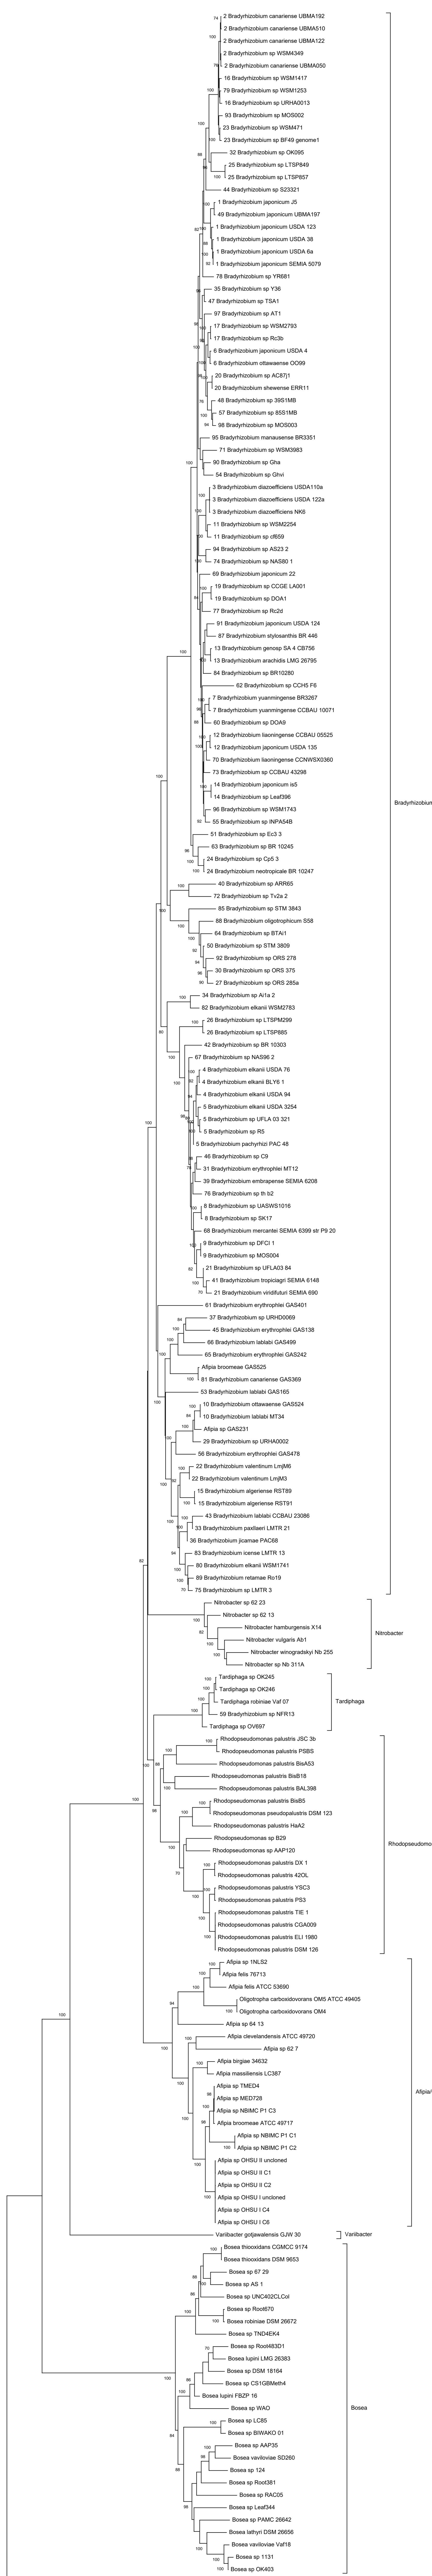

Supplement: Image_1.pdf [file Image_1.pdf]
