# Supplementary material for: A Genomotaxonomy View of the Bradyrhizobium Genus
Source: PubMed Central journal article supplement (PMC6585233; doi:10.3389/fmicb.2019.01334), 2019-06-13

Supplementary Figure 2

Phylogenomic tree of *Bradyrhizobium*. Superclades are indicated with Roman numerals. The tree was constructed with maximum likelihood using a concatenated alignment of 31 conserved proteins identified with AMPHORA2 (7672 aa alignment length). Bootstrap node support values lower than 70% are not shown.

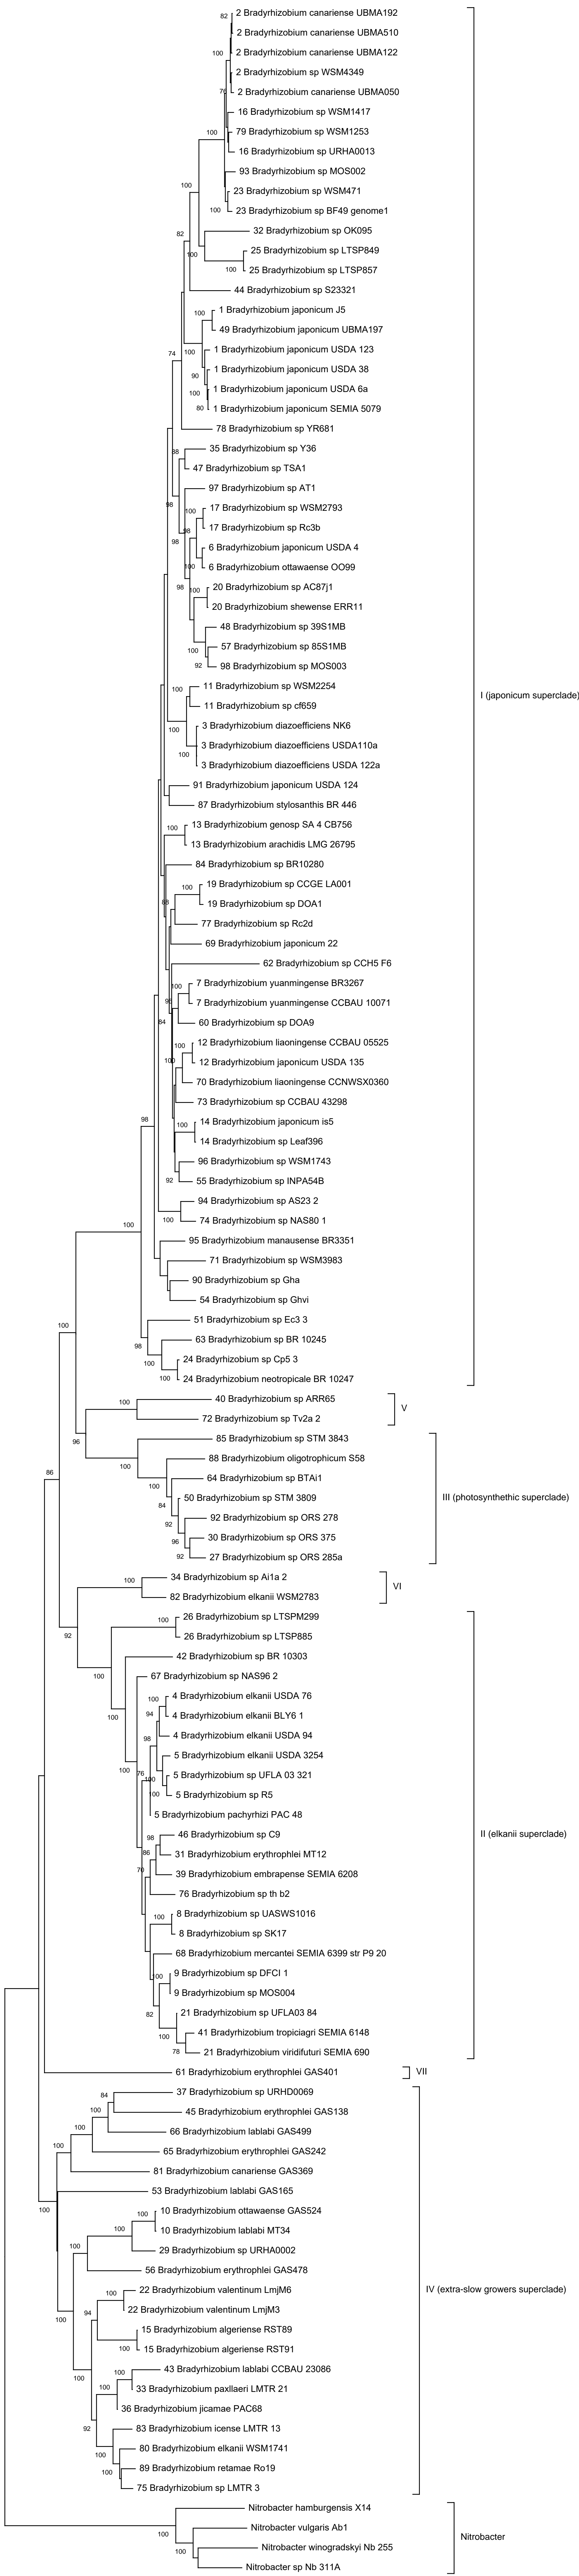

Supplement: Image_2.pdf [file Image_2.pdf]
