# Supplementary material for: A Genomotaxonomy View of the Bradyrhizobium Genus
Source: PubMed Central journal article supplement (PMC6585233; doi:10.3389/fmicb.2019.01334), 2019-06-13
Supplement: Table_1.pdf [file Table_1.pdf]

**Supplementary Table 1.** Genomes of strains labelled as *Bradyrhizobium* in GenBank

| Strain               | Accession       | Superclade <sup>a</sup> | OTU <sup>b</sup> | Length (bp) |
|----------------------|-----------------|-------------------------|------------------|-------------|
| CCBAU 15354          | GCA_000261545.1 | I                       | 1                | 10,126,594  |
| CCBAU 15517          | GCA_000261565.1 | I                       | 1                | 9,917,031   |
| CCBAU 15618          | GCA_000261585.1 | I                       | 1                | 9,824,012   |
| CCBAU 25435          | GCA_000261605.1 | I                       | 1                | 9,460,795   |
| CCBAU 83623          | GCA_000261625.1 | I                       | 1                | 10,074,298  |
| USDA 6 <sup>T</sup>  | GCA_000284375.1 | I                       | 1                | 9,207,384   |
| USDA 6 <sup>T</sup>  | GCA_000472985.1 | I                       | 1                | 9,131,141   |
| USDA 38              | GCA_000472745.1 | I                       | 1                | 9,608,975   |
| USDA 123             | GCA_000482525.1 | I                       | 1                | 10,457,665  |
| SEMIA 5079           | GCA_000661935.1 | I                       | 1                | 9,583,027   |
| Is-34                | GCA_000773865.1 | I                       | 1                | 10,326,597  |
| E109                 | GCA_000807315.1 | I                       | 1                | 9,224,208   |
| FN1                  | GCA_001038185.1 | I                       | 1                | 9,138,496   |
| J5                   | GCA_001887695.1 | I                       | 1                | 10,138,651  |
| G22                  | GCA_900011265.1 | I                       | 1                | 9,091,355   |
| WSM4349              | GCA_000373125.1 | I                       | 2                | 8,294,334   |
| UBMA050              | GCA_002108675.1 | I                       | 2                | 8,299,015   |
| UBMA051              | GCA_002108695.1 | I                       | 2                | 8,273,379   |
| UBMA060              | GCA_002108725.1 | I                       | 2                | 8,291,234   |
| UBMA052              | GCA_002108745.1 | I                       | 2                | 8,294,491   |
| UBMA061              | GCA_002108755.1 | I                       | 2                | 8,267,021   |
| UBMA195              | GCA_002108775.1 | I                       | 2                | 8,274,608   |
| UBMAN05              | GCA_002108805.1 | I                       | 2                | 8,376,411   |
| UBMA122              | GCA_002108825.1 | I                       | 2                | 8,214,782   |
| UBMA182              | GCA_002108845.1 | I                       | 2                | 8,216,640   |
| UBMA192              | GCA_002108865.1 | I                       | 2                | 8,287,509   |
| UBMA183              | GCA_002108875.1 | I                       | 2                | 8,288,770   |
| UBMA510              | GCA_002108905.1 | I                       | 2                | 8,367,860   |
| UBMA181              | GCA_002108965.1 | I                       | 2                | 8,299,676   |
| UBMA171              | GCA_002108995.1 | I                       | 2                | 8,279,565   |
| USDA110 <sup>T</sup> | GCA_000011365.1 | I                       | 3                | 9,105,828   |
| USDA110 <sup>T</sup> | GCA_001642675.1 | I                       | 3                | 9,106,064   |
| CCBAU 41267          | GCA_000261765.1 | I                       | 3                | 9,121,826   |
| USDA 122             | GCA_000473025.1 | I                       | 3                | 8,976,980   |
| USDA 122             | GCA_001908315.1 | I                       | 3                | 9,136,536   |
| SEMIA 5080           | GCA_000648595.2 | I                       | 3                | 9,085,533   |
| Is-1                 | GCA_001280585.1 | I                       | 3                | 8,983,878   |
| NK6                  | GCA_001549695.1 | I                       | 3                | 10,475,157  |
| Y21                  | GCA_002531995.1 | I                       | 3                | 8,941,773   |
| CCBAU 15544          | GCA_000261705.1 | I                       | 4                | 8,484,383   |

|                          |                 |   |    |                        |
|--------------------------|-----------------|---|----|------------------------|
| CCBAU 15615              | GCA_000261725.1 | I | 4  | 8,852,539              |
| CCBAU 15635              | GCA_000261745.1 | I | 4  | 8,288,715              |
| USDA 4                   | GCA_000472725.1 | I | 4  | 8,737,671              |
| OO99 <sup>†</sup>        | GCA_002278135.1 | I | 4  | 8,677,102              |
| L2                       | GCA_002532025.1 | I | 4  | 8,797,357              |
| CCBAU 05623              | GCA_000261785.1 | I | 5  | 8,245,751              |
| CCBAU 25021              | GCA_000261805.1 | I | 5  | 7,990,949              |
| CCBAU 35157              | GCA_000261825.1 | I | 5  | 7,854,129              |
| BR3267                   | GCA_001439885.1 | I | 5  | 7,904,309              |
| SUTN9-2                  | GCA_003122645.1 | I | 5  | 8,092,255              |
| CCBAU 10071 <sup>†</sup> | GCA_900094575.1 | I | 5  | 8,201,522              |
| WSM2254                  | GCA_000472645.1 | I | 6  | 9,086,516              |
| JGI 0001019-J21          | GCA_000485255.1 | I | 6  | 1,191,681 <sup>c</sup> |
| cf659                    | GCA_900113725.1 | I | 6  | 8,465,016              |
| CCBAU 05525              | GCA_000261645.1 | I | 7  | 8,164,124              |
| CCBAU 83689              | GCA_000261665.1 | I | 7  | 8,009,819              |
| USDA 135                 | GCA_000472945.1 | I | 7  | 7,703,324              |
| USDA 3384                | GCA_000472685.1 | I | 8  | 9,800,269              |
| CB756                    | GCA_000473125.1 | I | 8  | 9,826,880              |
| LMG 26795 <sup>†</sup>   | GCA_900116675.1 | I | 8  | 9,793,799              |
| is5                      | GCA_000421305.1 | I | 9  | 7,588,794              |
| in8p8                    | GCA_000426845.1 | I | 9  | 7,589,915              |
| Leaf396                  | GCA_001424605.1 | I | 9  | 7,709,278              |
| WSM1417                  | GCA_000515415.1 | I | 10 | 8,048,963              |
| URHA0013                 | GCA_000518345.1 | I | 10 | 7,193,102              |
| WSM2793                  | GCA_000379585.1 | I | 11 | 8,871,253              |
| Rc3b                     | GCA_900114915.1 | I | 11 | 8,375,670              |
| CCGE-LA001               | GCA_000296215.2 | I | 12 | 7,833,499              |
| DOA1                     | GCA_001593325.1 | I | 12 | 7,543,105              |
| AC87j1                   | GCA_002936975.1 | I | 13 | 8,683,180              |
| ERR11 <sup>†</sup>       | GCA_900094605.1 | I | 13 | 9,163,226              |
| WSM471                   | GCA_000244915.1 | I | 14 | 7,784,016              |
| BF49_genome1             | GCA_900011245.1 | I | 14 | 7,547,693              |
| Cp5.3                    | GCA_000426265.1 | I | 15 | 8,918,781              |
| BR 10247 <sup>†</sup>    | GCA_001641695.1 | I | 15 | 8,679,329              |
| LTSP849                  | GCA_000938255.1 | I | 16 | 8,570,160              |
| LTSP857                  | GCA_000938285.1 | I | 16 | 8,426,077              |
| OK095                    | GCA_900109945.1 | I | 17 | 7,846,124              |
| Y36                      | GCA_002531575.1 | I | 18 | 7,327,521              |
| S23321                   | GCA_000284275.1 | I | 19 | 7,231,841              |
| TSA1 <sup>†</sup>        | GCA_002776695.1 | I | 20 | 8,199,267              |
| 39S1MB                   | GCA_002266435.1 | I | 21 | 7,068,339              |
| UBMA197                  | GCA_002108935.1 | I | 22 | 10,442,239             |

|                       |                 |    |    |                        |
|-----------------------|-----------------|----|----|------------------------|
| Ec3.3                 | GCA_000472925.1 | I  | 23 | 10,034,502             |
| JGI 0001019-M21       | GCA_000485335.1 | I  | 24 | 236,340 <sup>c</sup>   |
| Ghvi                  | GCA_900115265.1 | I  | 25 | 7,925,674              |
| INPA54B <sup>T</sup>  | GCA_002795245.1 | I  | 26 | 8,252,029              |
| 85S1MB                | GCA_002266465.1 | I  | 27 | 7,037,054              |
| DOA9                  | GCA_000617845.2 | I  | 28 | 7,850,549              |
| CCH5-F6               | GCA_001556045.1 | I  | 29 | 8,163,151              |
| BR 10245 <sup>T</sup> | GCA_001641635.1 | I  | 30 | 10,111,113             |
| 22                    | GCA_000482425.1 | I  | 31 | 7,504,559              |
| CCNWSX0360            | GCA_001595995.1 | I  | 32 | 8,590,559              |
| WSM3983               | GCA_000473045.1 | I  | 33 | 8,789,602              |
| CCBAU 43298           | GCA_000261685.1 | I  | 34 | 7,916,986              |
| NAS80.1               | GCA_001908205.1 | I  | 35 | 9,235,468              |
| Rc2d                  | GCA_900099855.1 | I  | 36 | 9,578,216              |
| YR681                 | GCA_000282615.1 | I  | 37 | 7,831,714              |
| WSM1253               | GCA_000244935.1 | I  | 38 | 8,719,808              |
| BR10280 <sup>T</sup>  | GCA_002068095.1 | I  | 39 | 8,698,798              |
| JGI 0001002-A22       | GCA_000464155.2 | I  | 40 | 1,961,262 <sup>c</sup> |
| BR 446 <sup>T</sup>   | GCA_001641335.1 | I  | 41 | 8,801,717              |
| Gha                   | GCA_900113735.1 | I  | 42 | 8,253,313              |
| USDA 124              | GCA_000374205.1 | I  | 43 | 9,002,274              |
| MOS002                | GCA_003020115.1 | I  | 44 | 7,575,111              |
| AS23.2                | GCA_001908185.1 | I  | 45 | 8,705,449              |
| BR3351 <sup>T</sup>   | GCA_001440035.1 | I  | 46 | 9,145,311              |
| WSM1743               | GCA_000473065.1 | I  | 47 | 8,341,956              |
| AT1                   | GCA_001590795.1 | I  | 48 | 7,534,837              |
| MOS003                | GCA_003020125.1 | I  | 49 | 7,261,081              |
| 587                   | GCA_000257685.2 | II | 50 | 8,673,157              |
| CCBAU 05737           | GCA_000261505.1 | II | 50 | 9,773,178              |
| CCBAU 43297           | GCA_000261525.1 | II | 50 | 9,347,700              |
| USDA 76 <sup>T</sup>  | GCA_000379145.1 | II | 50 | 9,484,767              |
| USDA 94               | GCA_000519225.1 | II | 50 | 9,558,895              |
| BLY6-1                | GCA_001718185.1 | II | 50 | 9,202,572              |
| BLY3-8                | GCA_001718205.1 | II | 50 | 9,198,916              |
| TnphoA 33             | GCA_001868735.1 | II | 50 | 9,529,806              |
| USDA 3254             | GCA_000472765.1 | II | 51 | 8,979,722              |
| USDA 3259             | GCA_000473005.1 | II | 51 | 8,722,461              |
| PAC 48 <sup>T</sup>   | GCA_001189245.1 | II | 51 | 8,711,973              |
| BR3262                | GCA_001440015.1 | II | 51 | 8,965,178              |
| UFLA 03-321           | GCA_001969825.1 | II | 51 | 8,595,048              |
| R5                    | GCA_900101405.1 | II | 51 | 9,444,915              |
| OHSU_III              | GCA_000497675.1 | II | 52 | 7,935,543              |
| UASWS1015             | GCA_000878305.1 | II | 52 | 7,820,754              |

|                          |                 |     |    |            |
|--------------------------|-----------------|-----|----|------------|
| UASWS1016                | GCA_001705105.1 | II  | 52 | 7,960,052  |
| UBA2491                  | GCA_002341725.1 | II  | 52 | 7,248,648  |
| SK17                     | GCA_002831585.1 | II  | 52 | 8,288,568  |
| DFCI-1                   | GCA_000465325.1 | II  | 53 | 7,646,147  |
| 17-4 str. JCM 18382      | GCA_001312945.1 | II  | 53 | 7,106,372  |
| PARBB1                   | GCA_002256335.1 | II  | 53 | 7,722,922  |
| MOS004                   | GCA_003020075.1 | II  | 53 | 7,574,276  |
| SEMIA 690 <sup>T</sup>   | GCA_001238275.1 | II  | 54 | 8,811,922  |
| UFLA03-84                | GCA_002289535.1 | II  | 54 | 8,628,932  |
| LTSPM299                 | GCA_000938235.1 | II  | 55 | 9,094,432  |
| LTSP885                  | GCA_000938305.1 | II  | 55 | 7,851,216  |
| MT12                     | GCA_900105845.1 | II  | 56 | 8,967,172  |
| SEMIA 6208 <sup>T</sup>  | GCA_001189235.2 | II  | 57 | 8,267,832  |
| SEMIA 6148 <sup>T</sup>  | GCA_001189845.1 | II  | 58 | 9,767,314  |
| BR 10303 <sup>T</sup>    | GCA_001542415.1 | II  | 59 | 8,722,143  |
| C9                       | GCA_002532045.1 | II  | 60 | 8,428,389  |
| NAS96.2                  | GCA_001908235.1 | II  | 61 | 8,927,485  |
| SEMIA 6399 <sup>T</sup>  | GCA_001982635.1 | II  | 62 | 8,842,857  |
| th.b2                    | GCA_000426785.1 | II  | 63 | 10,118,060 |
| ORS 285                  | GCA_000239755.2 | III | 64 | 7,602,254  |
| ORS 285                  | GCA_900176205.1 | III | 64 | 7,797,098  |
| ORS 375                  | GCA_000239775.2 | III | 65 | 7,859,468  |
| STM 3809                 | GCA_000239795.2 | III | 66 | 7,311,748  |
| BTAi1                    | GCA_000015165.1 | III | 67 | 8,493,513  |
| STM 3843                 | GCA_000239815.2 | III | 68 | 8,434,788  |
| S58 <sup>T</sup>         | GCA_000344805.1 | III | 69 | 8,264,165  |
| ORS 278                  | GCA_000026145.1 | III | 70 | 7,456,587  |
| GAS524                   | GCA_900099825.1 | IV  | 71 | 8,339,215  |
| GAS522                   | GCA_900104755.1 | IV  | 71 | 8,269,569  |
| MT34                     | GCA_900142345.1 | IV  | 71 | 8,150,968  |
| RST89 <sup>T</sup>       | GCA_003062285.1 | IV  | 72 | 8,824,342  |
| RST91                    | GCA_003062295.1 | IV  | 72 | 8,907,982  |
| LmjM6                    | GCA_001440385.1 | IV  | 73 | 9,146,476  |
| LmjM3 <sup>T</sup>       | GCA_001440405.1 | IV  | 73 | 8,845,258  |
| URHA0002                 | GCA_000426105.1 | IV  | 74 | 6,972,827  |
| LMTR 21 <sup>T</sup>     | GCA_001693515.1 | IV  | 75 | 8,290,608  |
| PAC68 <sup>T</sup>       | GCA_001440395.1 | IV  | 76 | 8,738,846  |
| URHD0069                 | GCA_000701345.1 | IV  | 77 | 6,793,945  |
| CCBAU 23086 <sup>T</sup> | GCA_001440475.1 | IV  | 78 | 8,817,291  |
| GAS138                   | GCA_900129425.1 | IV  | 79 | 9,092,136  |
| GAS165                   | GCA_002797515.1 | IV  | 80 | 6,132,387  |
| GAS478                   | GCA_900129675.1 | IV  | 81 | 11,738,562 |
| GAS242                   | GCA_900129505.1 | IV  | 82 | 9,184,751  |

|                      |                 |                |    |           |
|----------------------|-----------------|----------------|----|-----------|
| GAS499               | GCA_900141755.1 | IV             | 83 | 7,910,099 |
| LMTR 3               | GCA_001693485.1 | IV             | 84 | 7,834,745 |
| WSM1741              | GCA_000472965.1 | IV             | 85 | 7,952,346 |
| GAS369               | GCA_900105125.1 | IV             | 86 | 7,842,044 |
| LMTR 13 <sup>1</sup> | GCA_001693385.1 | IV             | 87 | 8,322,773 |
| Ro19 <sup>1</sup>    | GCA_001440415.1 | IV             | 88 | 8,466,225 |
| ARR65                | GCA_000472385.1 | V              | 89 | 8,613,869 |
| Tv2a-2               | GCA_000472425.1 | V              | 90 | 8,496,279 |
| Ai1a-2               | GCA_000426245.1 | VI             | 91 | 9,029,266 |
| WSM2783              | GCA_000472865.1 | VI             | 92 | 9,902,361 |
| GAS401               | GCA_900142985.1 | VII            | 93 | 7,525,217 |
| CCH1-B1              | GCA_001556485.1 | - <sup>d</sup> | 94 | 4,299,406 |
| CCH5-A9              | GCA_001556725.1 | - <sup>d</sup> | 94 | 4,713,629 |
| CCH4-A6              | GCA_001556245.1 | - <sup>d</sup> | 95 | 5,299,950 |
| CCH10-C7             | GCA_001556255.1 | - <sup>d</sup> | 95 | 5,592,688 |
| 35-63-5              | GCA_002280915.1 | - <sup>d</sup> | 96 | 515,174   |
| HPC(L)               | GCA_000304595.1 | - <sup>d</sup> | 97 | 5,272,243 |
| NFR13                | GCA_900114605.1 | - <sup>d</sup> | 98 | 6,226,103 |

<sup>a</sup>Based on a phylogenic analysis performed with AMPHORA2.

<sup>b</sup>Based on a 95% cutoff ANI value.

<sup>c</sup>Partial genome.

<sup>d</sup>Does not belong to the *Bradyrhizobium* genus.
