# Supplementary material for: A Genomotaxonomy View of the Bradyrhizobium Genus
Source: PubMed Central journal article supplement (PMC6585233; doi:10.3389/fmicb.2019.01334), 2019-06-13
Supplement: Table_2.pdf [file Table_2.pdf]

**Supplementary Table 2.** Presence of genes for the plasmid partition protein RepB in the genomes of *Bradyrhizobium*

| <b>Strain</b>                                  | <b>Number of <i>repB</i> genes</b> |
|------------------------------------------------|------------------------------------|
| <i>Bradyrhizobium liaoningense</i> CCBAU 05525 | 6                                  |
| <i>Bradyrhizobium diazoefficiens</i> NK6       | 5                                  |
| <i>Bradyrhizobium japonicum</i> USDA 123       | 4                                  |
| <i>Bradyrhizobium japonicum</i> USDA 135       | 3                                  |
| <i>Bradyrhizobium</i> sp. Leaf396              | 2                                  |
| <i>Bradyrhizobium algeriense</i> RST89         | 2                                  |
| <i>Bradyrhizobium algeriense</i> RST91         | 2                                  |
| <i>Bradyrhizobium</i> sp. Ai1a 2               | 2                                  |
| <i>Bradyrhizobium japonicum</i> UBMA197        | 2                                  |
| <i>Bradyrhizobium</i> sp. CCH5 F6              | 2                                  |
| <i>Bradyrhizobium japonicum</i> 22             | 2                                  |
| <i>Bradyrhizobium yuanmingense</i> CCBAU 10071 | 2                                  |
| <i>Bradyrhizobium</i> sp. UASWS1016            | 2                                  |
| <i>Bradyrhizobium japonicum</i> is5            | 1                                  |
| <i>Bradyrhizobium</i> sp. WSM4349              | 1                                  |
| <i>Bradyrhizobium</i> sp. AC87j1               | 1                                  |
| <i>Bradyrhizobium viridifuturi</i> SEMIA 690   | 1                                  |
| <i>Bradyrhizobium</i> sp. Cp5 3                | 1                                  |
| <i>Bradyrhizobium elkanii</i> USDA 76          | 1                                  |
| <i>Bradyrhizobium elkanii</i> USDA 94          | 1                                  |
| <i>Bradyrhizobium elkanii</i> USDA 3254        | 1                                  |
| <i>Bradyrhizobium</i> sp. R5                   | 1                                  |
| <i>Bradyrhizobium</i> sp. Ghvi                 | 1                                  |
| <i>Bradyrhizobium japonicum</i> USDA 4         | 1                                  |
| <i>Bradyrhizobium</i> sp. DOA9                 | 1                                  |
| <i>Bradyrhizobium</i> sp. BTAi1                | 1                                  |
| <i>Bradyrhizobium liaoningense</i> CCNWSX0360  | 1                                  |
| <i>Bradyrhizobium</i> sp. th b2                | 1                                  |
| <i>Bradyrhizobium</i> sp. WSM1253              | 1                                  |
| <i>Bradyrhizobium</i> sp. SK17                 | 1                                  |
| <i>Bradyrhizobium elkanii</i> WSM2783          | 1                                  |

|                                         |   |
|-----------------------------------------|---|
| <i>Bradyrhizobium</i> sp. DFCI 1        | 1 |
| <i>Bradyrhizobium</i> sp. MOS004        | 1 |
| <i>Bradyrhizobium</i> sp. Gha           | 1 |
| <i>Bradyrhizobium manausense</i> BR3351 | 1 |
